# Supplementary material
Source: publisher site journal article supplement (http://www.kjim.org/upload/media/kjim-2023-062-Supplementary-Fig-1.pdf)
Supplement: Supplementary file 1 [file kjim-2023-062-Supplementary-Fig-1.pdf]

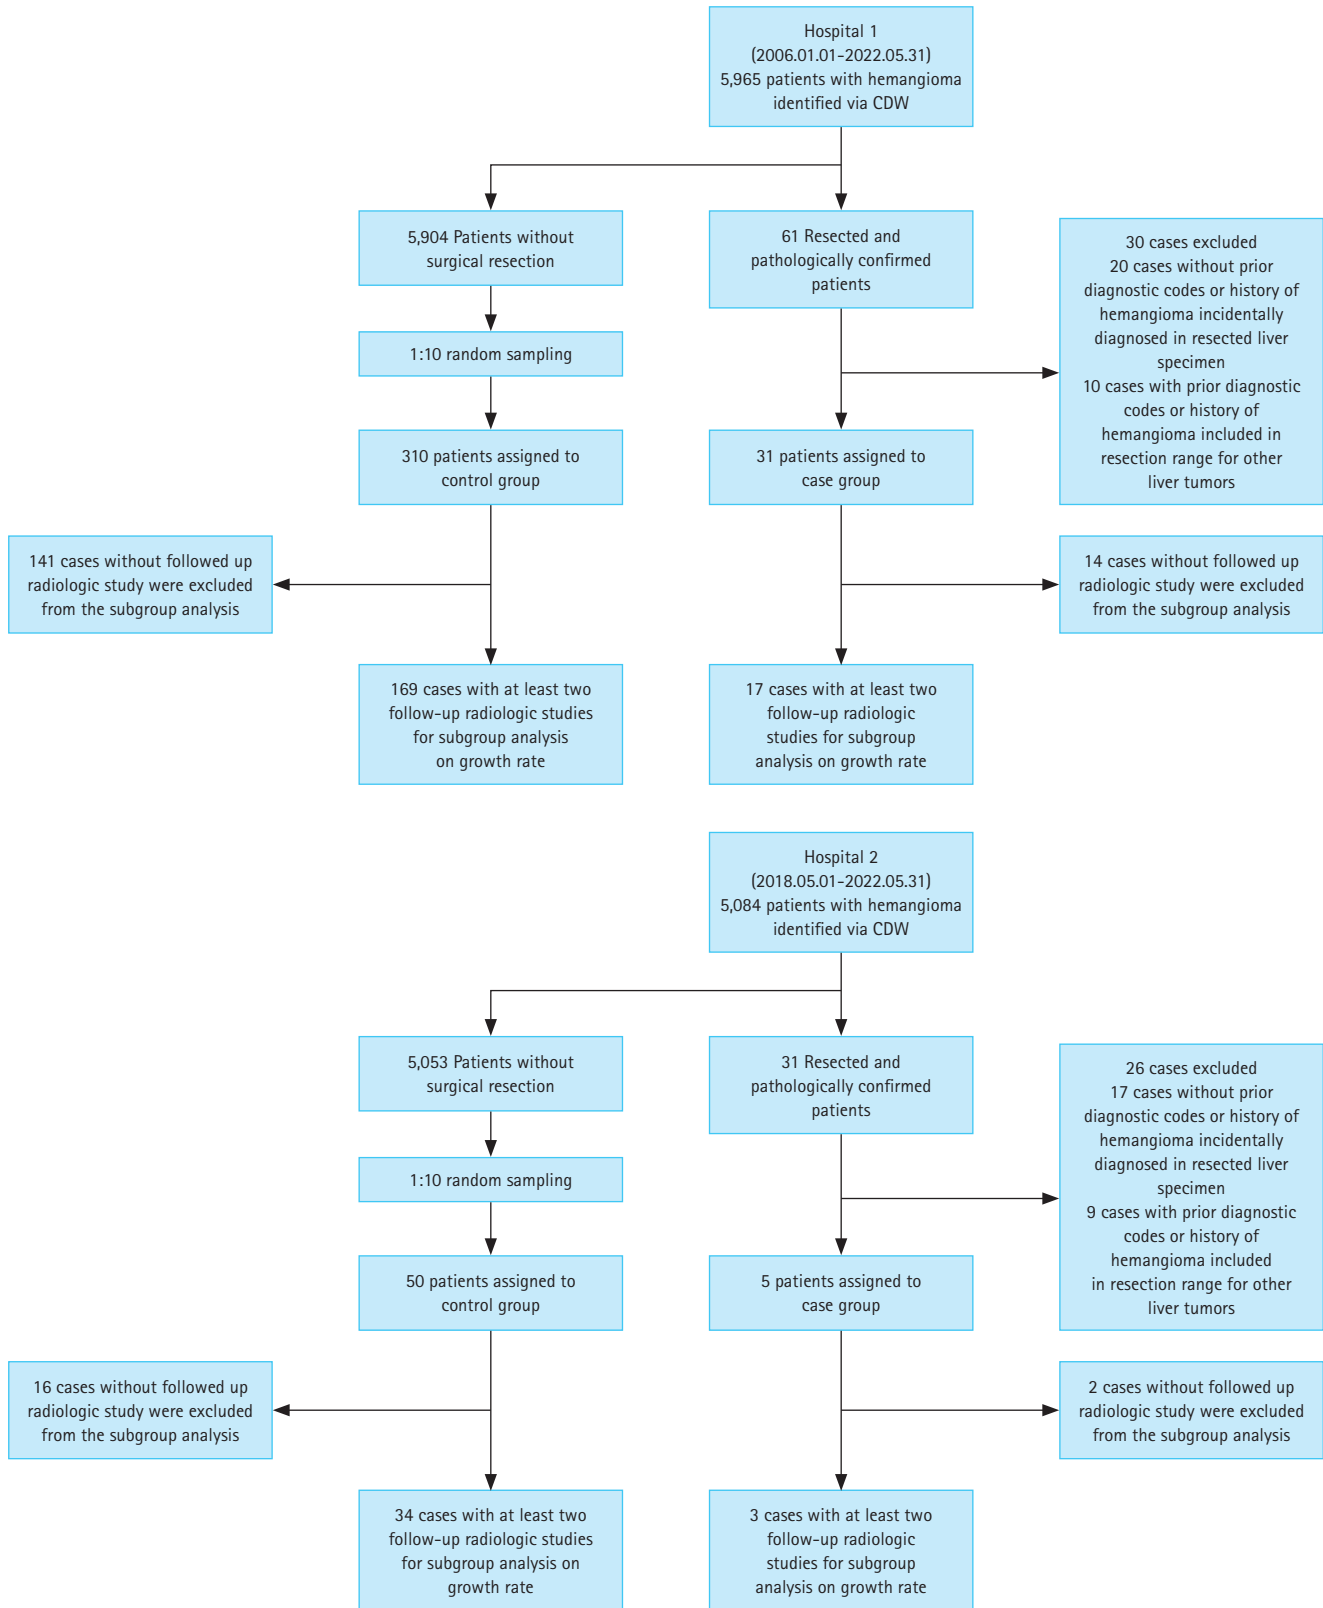

**Supplementary Figure 1.** Patient enrollment flowchart from 2 hospitals. Using a clinical database warehouse, data on patients diagnosed as having a hepatic hemangioma (International Classification of Diseases, 10th revision [ICD-10] code D18.03) from January 2006 to May 2022 were retrieved from two tertiary hospitals. Inclusion and exclusion criteria were indicated.
